# Supplementary material for: Differential Effects of GLP-1 Receptor Agonists on Cancer Risk in Obesity: A Nationwide Analysis of 1.1 Million Patients
Source: MDPI journal article supplement (doi:10.3390/cancers17010078), 2024-12-30
Supplement: s1 [file cancers-3345519-supplementary.pdf › cancers-3345519-supplementary.pdf]

**Table S1.** Inclusion criteria.

| Criteria           | Category     | Code                     | Description                                                     |
|--------------------|--------------|--------------------------|-----------------------------------------------------------------|
| Known demographics | Demographics | UMLS:HL7V3.0:Race:1002-5 | American Indian or Alaska Native                                |
|                    | Demographics | UMLS:HL7V3.0:Race:2028-9 | Asian                                                           |
|                    | Demographics | UMLS:HL7V3.0:Race:2054-5 | Black or African American                                       |
|                    | Demographics | UMLS:HL7V3.0:Race:2076-8 | Native Hawaiian or Other Pacific Islander                       |
| Obesity            | Diagnosis    | UMLS:ICD10CM:Z68.3       | Body mass index 30–39, adult                                    |
|                    | Diagnosis    | UMLS:ICD10CM:Z68.4       | Body mass index 40 or greater, adult                            |
|                    | Diagnosis    | UMLS:ICD10CM:E66.0       | Obesity due to excess calories (at least 18 years old at event) |
| GLP1R agonists     | Medication   | NLM:RXNORM:1991302       | Semaglutide (at least 18 years at event)                        |
|                    | Medication   | NLM:RXNORM:475968        | Liraglutide (at least 18 years at event)                        |
|                    | Medication   | NLM:RXNORM:1551291       | Dulaglutide (at least 18 years at event)                        |

**Table S2.** Exclusion criteria.

| Criteria                      | Category   | Code                 | Description                     |
|-------------------------------|------------|----------------------|---------------------------------|
| Neoplasm                      | Diagnosis  | UMLS:ICD10CM:C00-D49 | Neoplasms                       |
| Other weight loss medications | Medication | NLM:RXNORM:1440051   | Lixisenatide                    |
|                               | Medication | NLM:RXNORM:1534763   | Albiglutide                     |
|                               | Medication | NLM:RXNORM:60548     | Exenatide                       |
| Bariatric surgery             | Procedure  | UMLS:CPT:1007392     | Other procedures on the stomach |
|                               | Procedure  | UMLS:CPT:1007385     | Bariatric surgery procedures    |
|                               | Diagnosis  | UMLS:ICD10CM:Z98.84  | Bariatric surgery status        |
| Pregnancy                     | Diagnosis  | UMLS:ICD10CM:Z33     | Pregnant state                  |

**Table S3.** ICD-10-CM codes utilized for study outcomes.

| Code    | Definition                                                         |
|---------|--------------------------------------------------------------------|
| C00-D49 | Neoplasms                                                          |
| C15-C26 | Malignant neoplasms of digestive organs                            |
| C15     | Malignant neoplasm of esophagus                                    |
| C16     | Malignant neoplasm of stomach                                      |
| C17     | Malignant neoplasm of small intestine                              |
| C18     | Malignant neoplasm of colon                                        |
| C19     | Malignant neoplasm of rectosigmoid junction                        |
| C20     | Malignant neoplasm of rectum                                       |
| C21     | Malignant neoplasm of anus and anal canal                          |
| 154     | Malignant neoplasm of rectum, rectosigmoid junction, and anus      |
| C25     | Malignant neoplasm of pancreas                                     |
| C22     | Malignant neoplasm of liver and intrahepatic bile ducts            |
| C23     | Malignant neoplasm of gallbladder                                  |
| C24     | Malignant neoplasm of other and unspecified parts of biliary tract |
| C43-C44 | Melanoma and other malignant neoplasms of skin                     |
| C43     | Malignant melanoma of skin                                         |
| C50     | Malignant neoplasms of breast                                      |
| C51-C58 | Malignant neoplasms of female genital organs                       |
| C51     | Malignant neoplasm of vulva                                        |
| C52     | Malignant neoplasm of vagina                                       |
| C53     | Malignant neoplasm of cervix uteri                                 |

|         |                                                                              |
|---------|------------------------------------------------------------------------------|
| C54     | Malignant neoplasm of corpus uteri                                           |
| C55     | Malignant neoplasm of uterus, part unspecified                               |
| C56     | Malignant neoplasm of ovary                                                  |
| C60–C63 | Malignant neoplasms of male genital organs                                   |
| C60     | Malignant neoplasm of penis                                                  |
| C61     | Malignant neoplasm of prostate                                               |
| C62     | Malignant neoplasm of testis                                                 |
| C64–C68 | Malignant neoplasms of urinary tract                                         |
| C69–C72 | Malignant neoplasms of eye, brain, and other parts of central nervous system |
| C00–C14 | Malignant neoplasms of lip, oral cavity, and pharynx                         |
| C73–C75 | Malignant neoplasms of thyroid and other endocrine glands                    |
| C30–C39 | Malignant neoplasms of respiratory and intrathoracic organs                  |
| C45–C49 | Malignant neoplasms of mesothelial and soft tissue                           |
| C40–C41 | Malignant neoplasms of bone and articular cartilage                          |
| C7A     | Malignant neuroendocrine tumors                                              |
| C81–C96 | Malignant neoplasms of lymphoid, hematopoietic, and related tissue           |
